# Supplementary material
Source: PubMed Central journal article supplement (PMC1434516)
Supplement: NIHMS4069-supplement-Supp.pdf [file NIHMS4069-supplement-Supp.pdf]

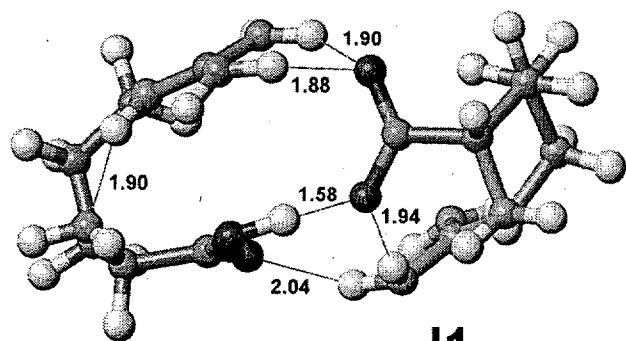

**I1**

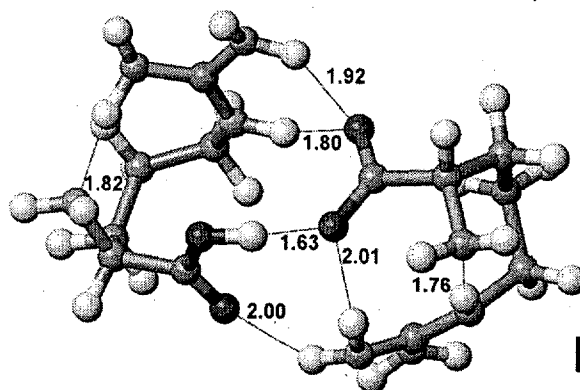

**I2**

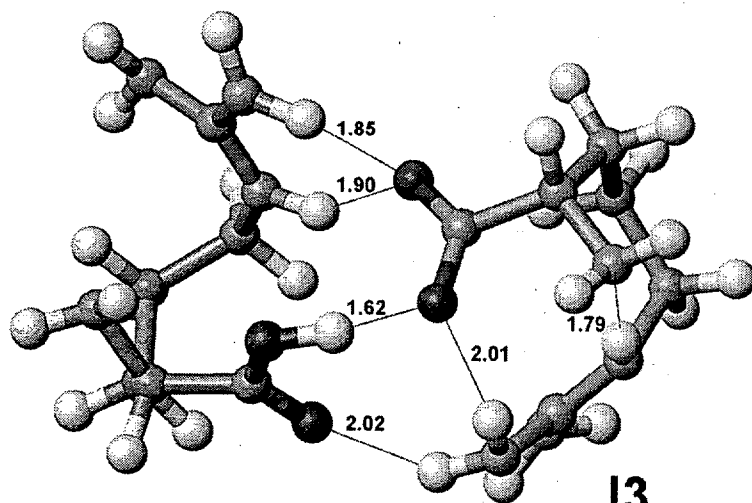

**I3**

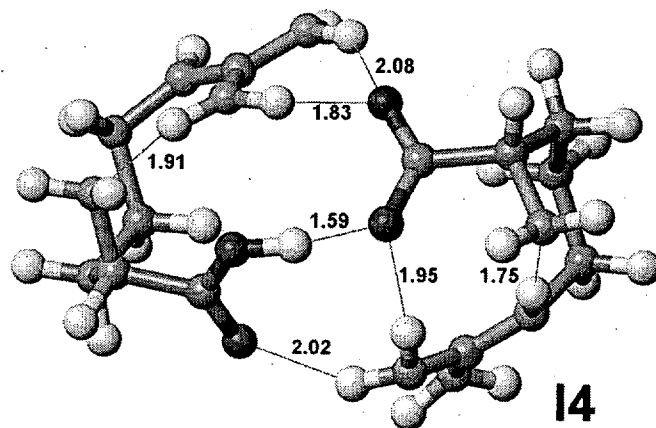

**I4**

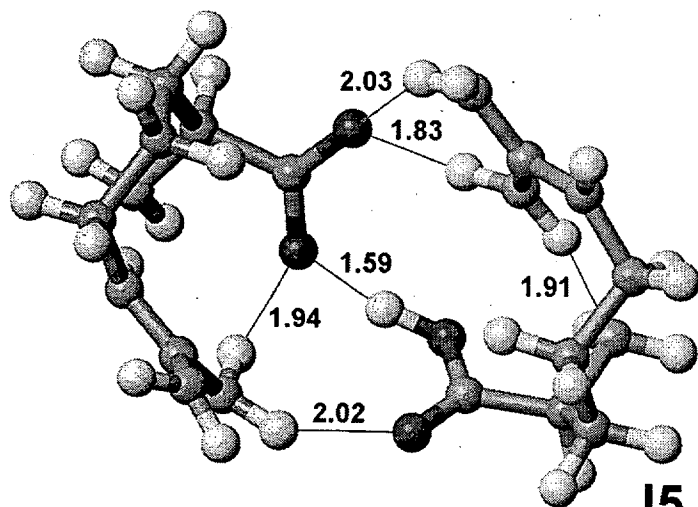

**I5**

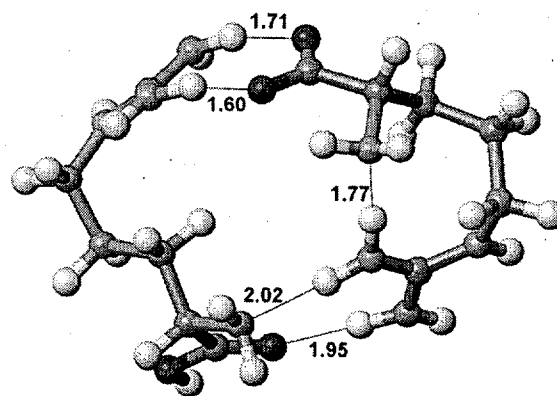

**I6**

Figure 1S

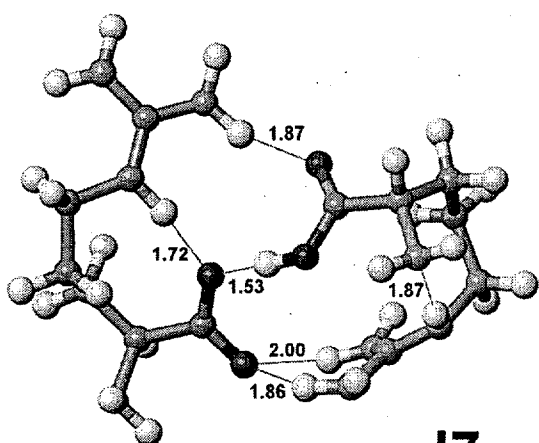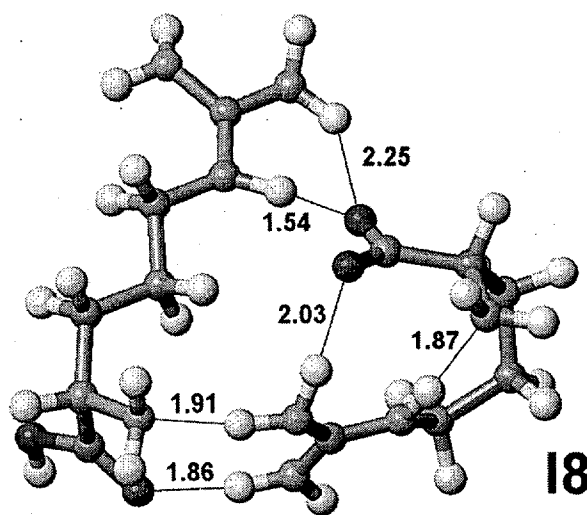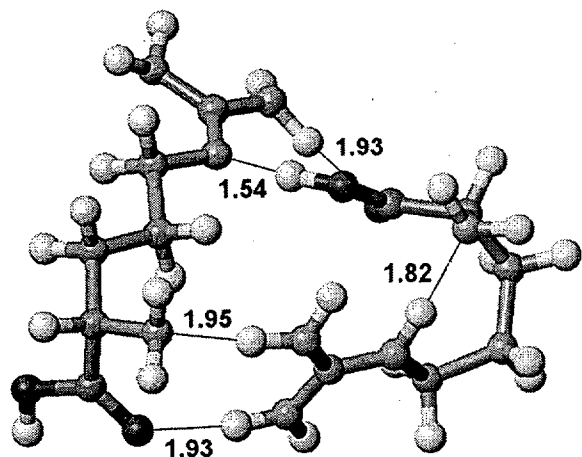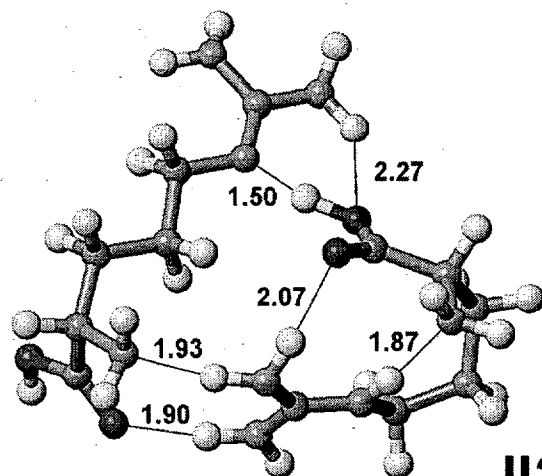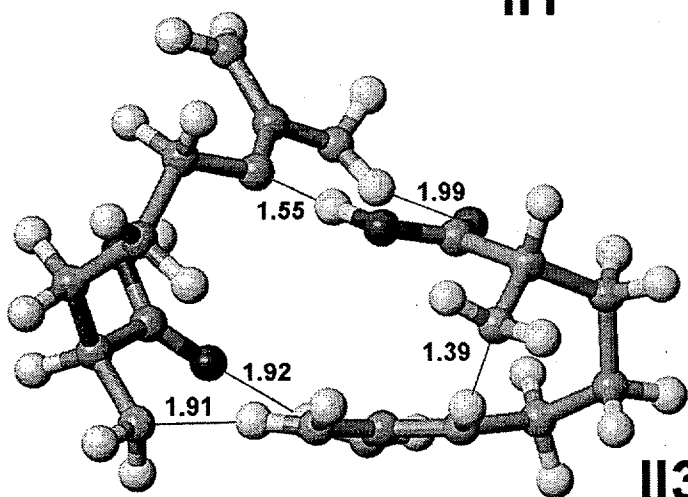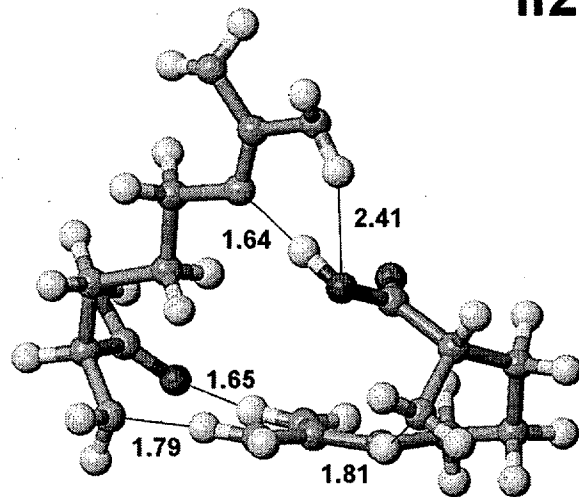

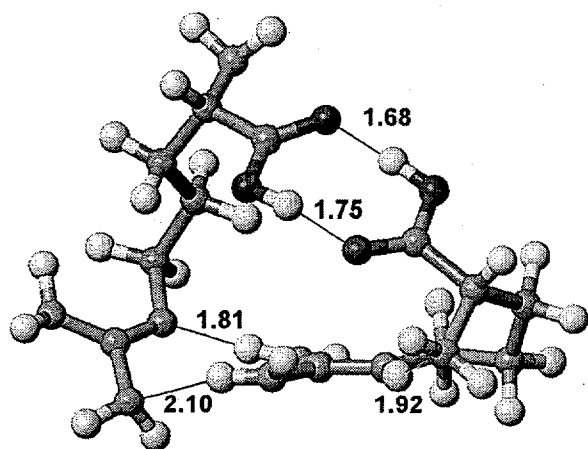

**II5**

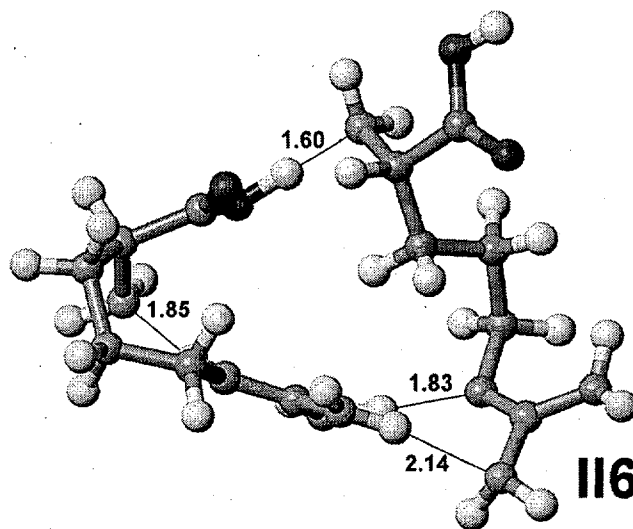

**II6**

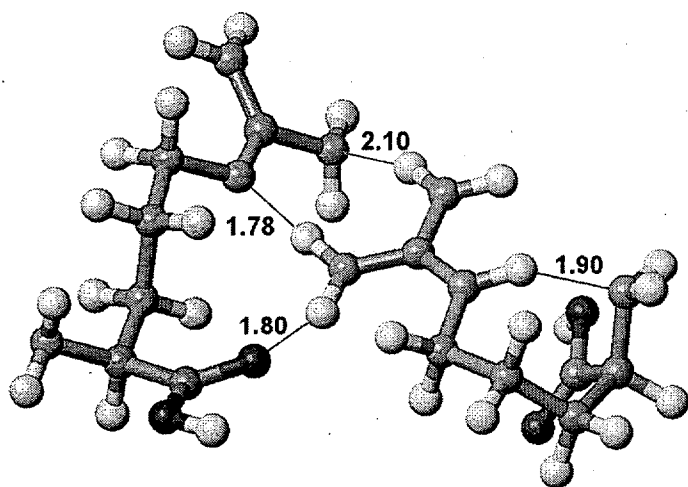

**II7**

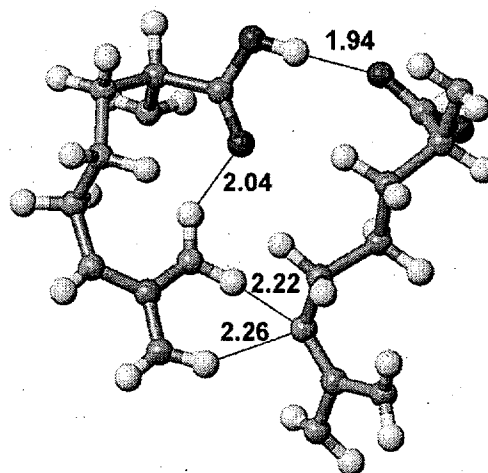

**II8**

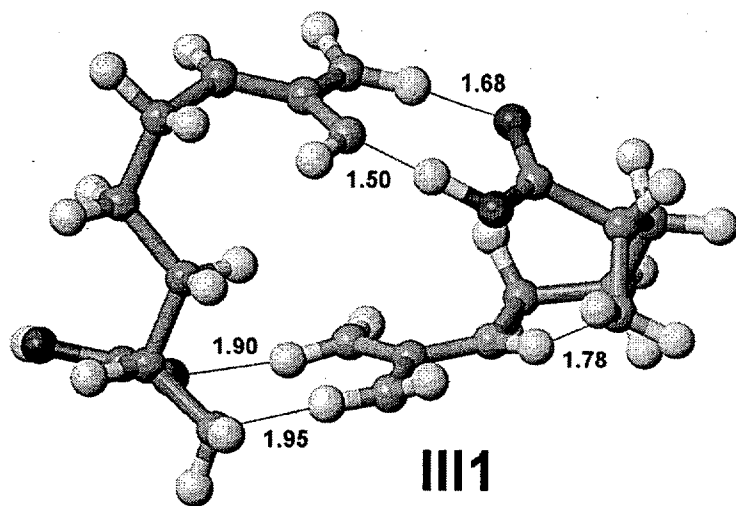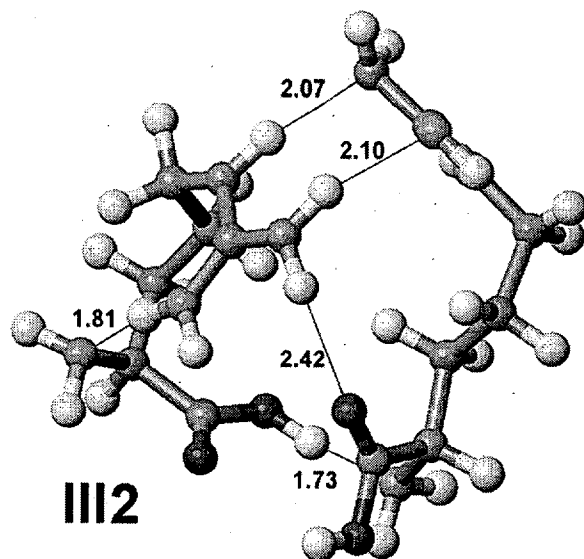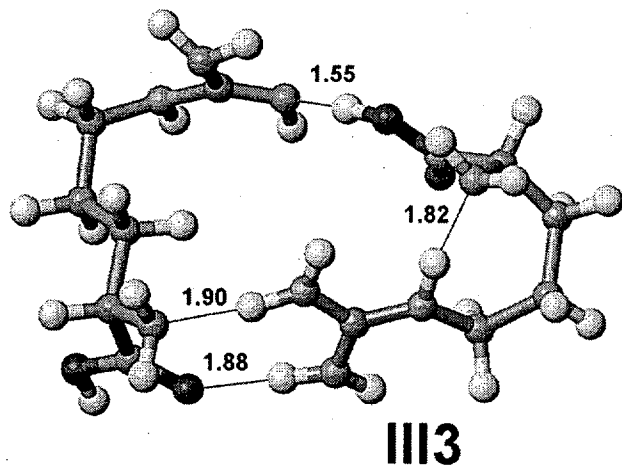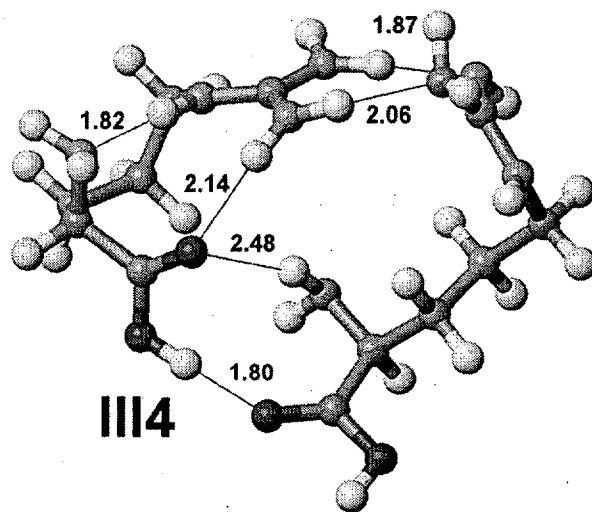

**Supplementary Table 1.** The torsional bond angles measured along the peptide backbone for the conformers of bradykinin.

| IV               | 1      |        | 2      |        | 3      |        | 4      |        | 5      |        | 6      |        | 7      |        |
|------------------|--------|--------|--------|--------|--------|--------|--------|--------|--------|--------|--------|--------|--------|--------|
|                  | $\psi$ | $\phi$ |
| Arg <sup>1</sup> | 158    |        | 153    |        | -8     |        | 174    |        | 173    |        | 153    |        | 173    |        |
| Pro <sup>2</sup> | 164    | -75    | 164    | -78    | -74    | -70    | 144    | -70    | 144    | -69    | 166    | -70    | 144    | -69    |
| Pro <sup>3</sup> | 76     | -79    | 49     | -85    | 92     | -94    | 54     | -94    | 47     | -92    | 93     | -94    | 47     | -92    |
| Gly <sup>4</sup> | 83     | -78    | 139    | -81    | 169    | 84     | -80    | -85    | -75    | 87     | 146    | -85    | -75    | 87     |
| Phe <sup>5</sup> | 18     | 74     | -45    | -77    | 171    | -77    | 170    | -77    | 173    | -73    | 39     | -77    | 173    | -73    |
| Ser <sup>6</sup> | 154    | -170   | 157    | -161   | -79    | -172   | 169    | -172   | 168    | -173   | 159    | -172   | 168    | -173   |
| Pro <sup>7</sup> | -47    | -82    | -30    | -83    | 55     | -70    | 91     | -70    | 91     | -71    | -29    | -70    | 91     | -71    |
| Phe <sup>8</sup> | -177   | -87    | 178    | -86    | 144    | 80     | -74    | 80     | -76    | 80     | -177   | 80     | -76    | 80     |
| Arg <sup>9</sup> |        | 53     |        | 58     |        | -152   |        | -153   |        | -153   |        | 57     |        | -153   |

| V                | 1      |        | 2      |        | 3      |        | VII    |        | 2      |        | 3      |        |
|------------------|--------|--------|--------|--------|--------|--------|--------|--------|--------|--------|--------|--------|
|                  | $\psi$ | $\phi$ |
| Arg <sup>1</sup> | 154    |        | 90     |        | 90     |        | 141    |        | 73     |        | 84     |        |
| Pro <sup>2</sup> | 165    | -74    | 155    | -74    | 157    | -75    | 167    | -75    | 158    | -69    | -36    | -56    |
| Pro <sup>3</sup> | 46     | -81    | 33     | -84    | 35     | -85    | 55     | -81    | 36     | -92    | -24    | -62    |
| Gly <sup>4</sup> | 152    | -78    | 117    | -74    | 115    | -76    | 114    | -70    | 100    | 87     | -17    | -72    |
| Phe <sup>5</sup> | -54    | 76     | 38     | 72     | 38     | 72     | 37     | 76     | 44     | -73    | 28     | -97    |
| Ser <sup>6</sup> | 164    | -172   | 165    | 84     | 164    | 82     | 164    | 80     | 167    | -173   | 162    | -72    |
| Pro <sup>7</sup> | -40    | -78    | 2      | -88    | -3     | -87    | -5     | -82    | -10    | -71    | -36    | -71    |
| Phe <sup>8</sup> | -176   | -80    | 180    | -78    | 164    | -78    | 101    | -74    | -158   | 80     | 142    | -77    |
| Arg <sup>9</sup> |        | 67     |        | 72     |        | 73     |        | 70     |        | -153   |        | -111   |
